# Supplementary material for: Investigating the Role of Gene-Gene Interactions in TB Susceptibility
Source: PubMed Central journal article supplement (PMC4412713; doi:10.1371/journal.pone.0123970), 2015-04-28

Model 5

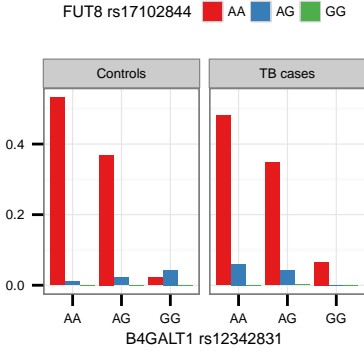

Model 6

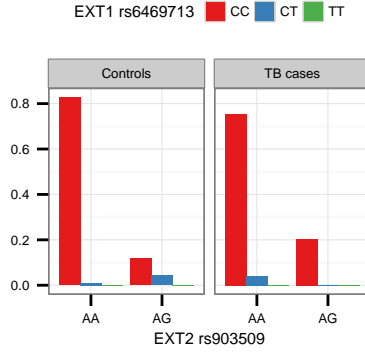

Model 8

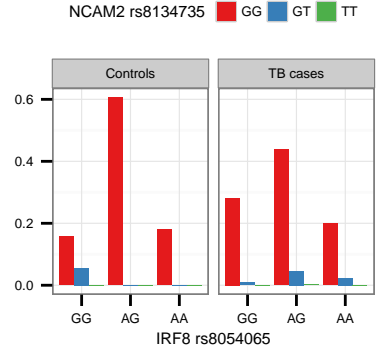

Model 9

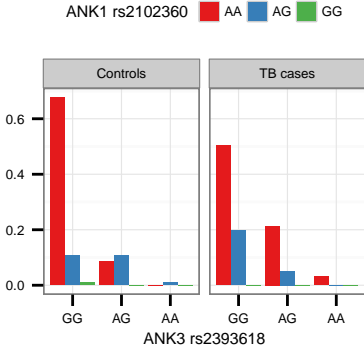

Model 10

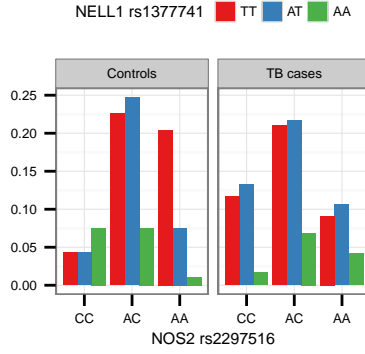

Model 11

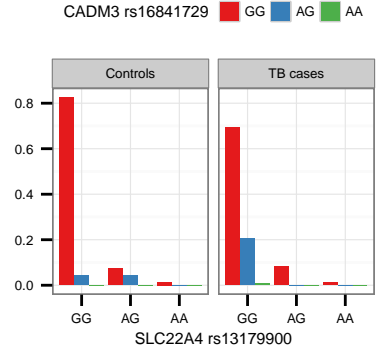

Model 12

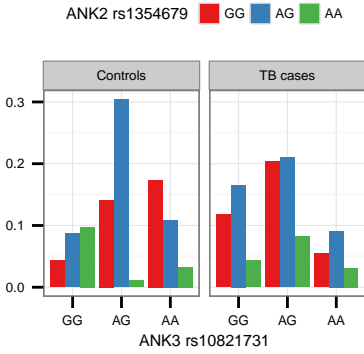

Model 15

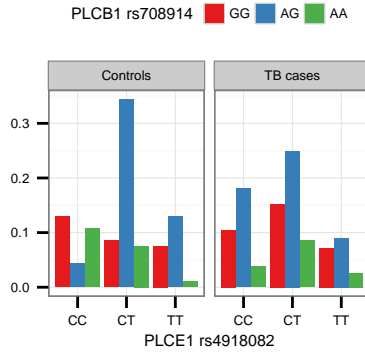

Model 16

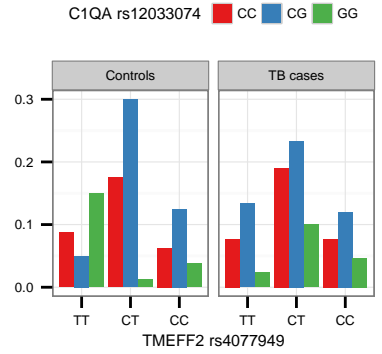

Model 17

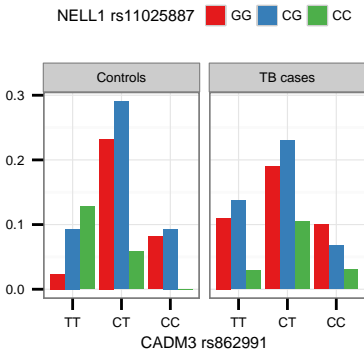

Model 18

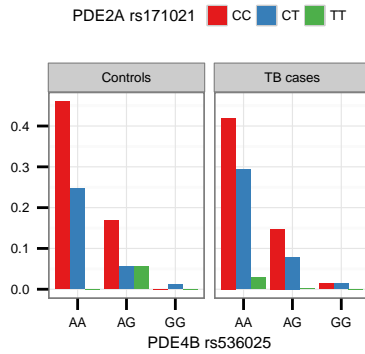

Model 20

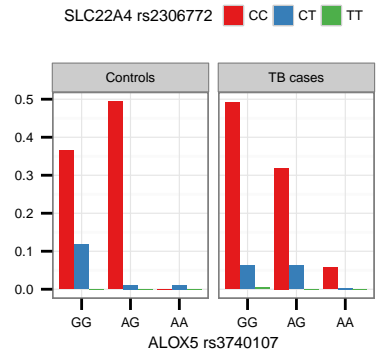

Supplement: pone.0123970.s001.pdf [file pone.0123970.s001.pdf]
