# Supplementary material for: Investigating the Role of Gene-Gene Interactions in TB Susceptibility
Source: PubMed Central journal article supplement (PMC4412713; doi:10.1371/journal.pone.0123970), 2015-04-28
Supplement: pone.0123970.s003.pdf [file pone.0123970.s003.pdf]

Model 5

FUT8 rs17102844

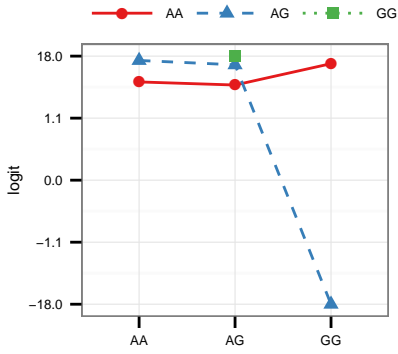

B4GALT1 rs12342831

Model 6

EXT1 rs6469713

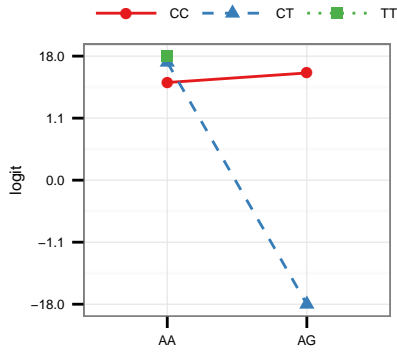

EXT2 rs903509

Model 8

NCAM2 rs8134735

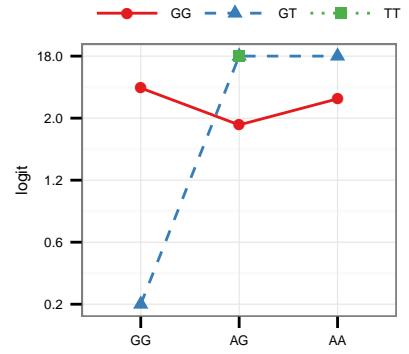

IRF8 rs8054065

Model 9

ANK1 rs2102360

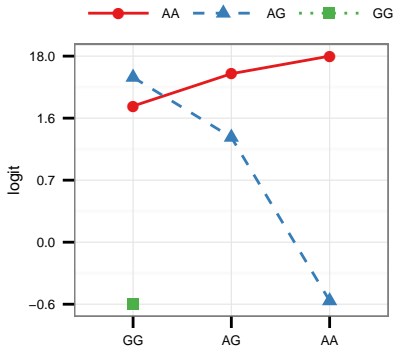

ANK3 rs2393618

Model 10

NELL1 rs1377741

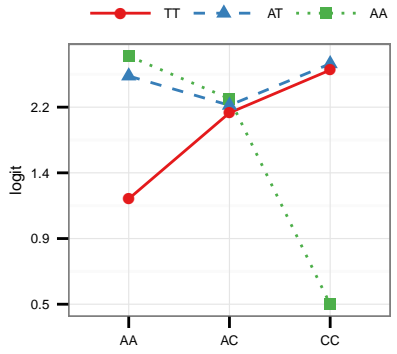

NOS2 rs2297516

Model 11

CADM3 rs16841729

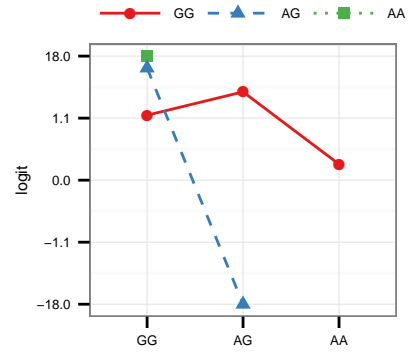

SLC22A4 rs13179900

Model 12

ANK2 rs1354679

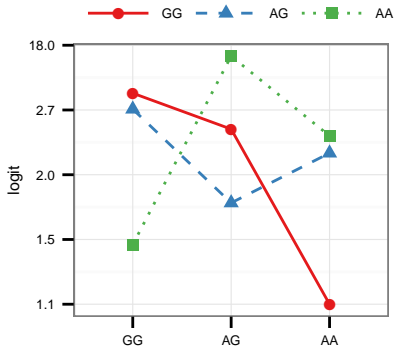

ANK3 rs10821731

Model 15

PLCB1 rs708914

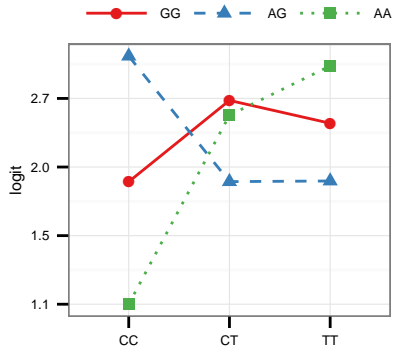

PLCE1 rs4918082

Model 16

C1QA rs12033074

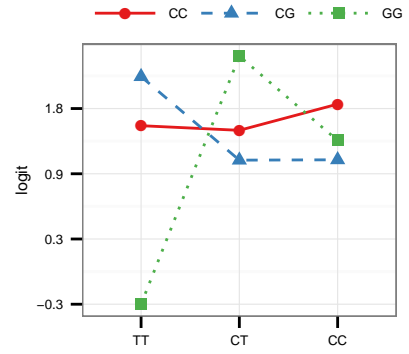

TMEFF2 rs4077949

Model 17

NELL1 rs11025887

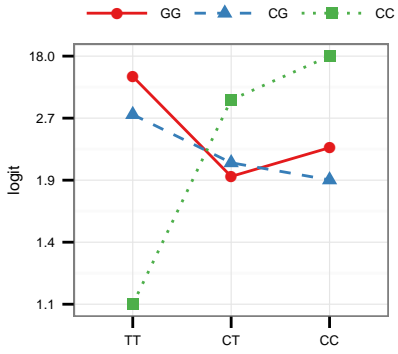

CADM3 rs862991

Model 18

PDE2A rs171021

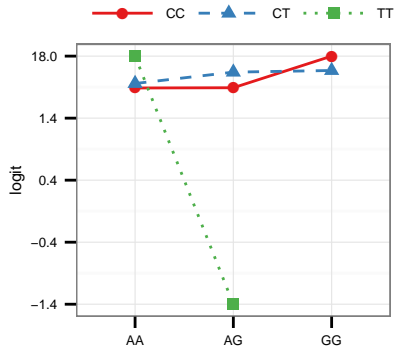

PDE4B rs536025

Model 20

SLC22A4 rs2306772

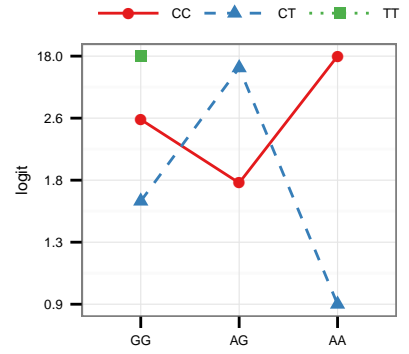

ALOX5 rs3740107
