# Supplementary material for: Investigating the Role of Gene-Gene Interactions in TB Susceptibility
Source: PubMed Central journal article supplement (PMC4412713; doi:10.1371/journal.pone.0123970), 2015-04-28

Model 3 recessive-additive

SFTPD rs1923537 AA/AG GG

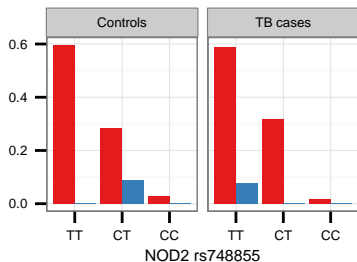

Model 5 dominant-recessive

FUT8 rs17102844 AA GG/AG

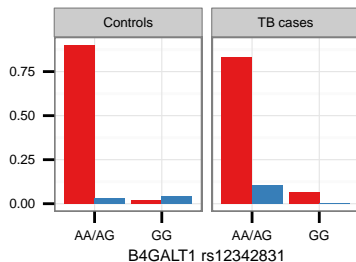

Model 7 dominant-recessive

ISG15 rs15842 CC TT/CT

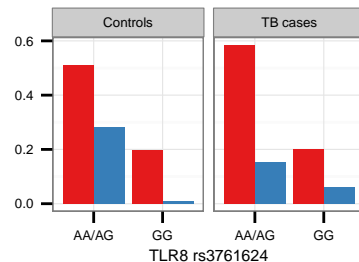

Model 8 dominant-dominant

NCAM2 rs8134735 GG TT/GT

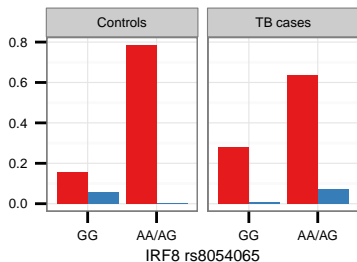

Model 9 dominant-additive

ANK1 rs2102360 AA GG/AG

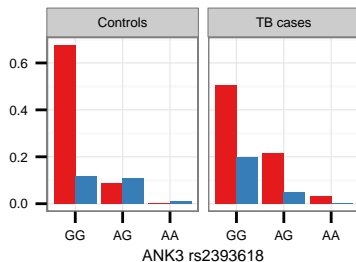

Model 16 recessive-dominant

C1QA rs12033074 CC/CG GG

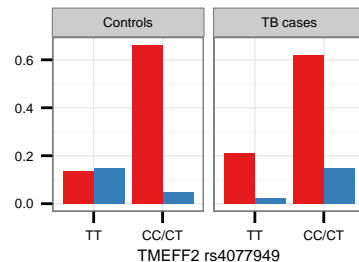

Model 17 recessive-dominant

NELL1 rs11025887 GG/CG CC

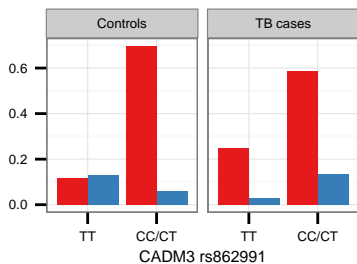

Model 18 recessive-additive

PDE2A rs171021 CC/CT TT

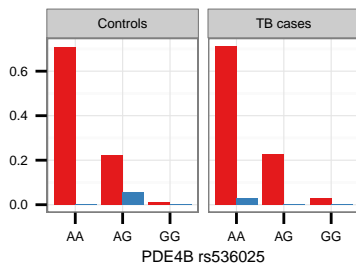

Supplement: pone.0123970.s004.pdf [file pone.0123970.s004.pdf]
