# Supplementary material for: Investigating the Role of Gene-Gene Interactions in TB Susceptibility
Source: PubMed Central journal article supplement (PMC4412713; doi:10.1371/journal.pone.0123970), 2015-04-28
Supplement: pone.0123970.s009.pdf [file pone.0123970.s009.pdf]

|          | Gene    | Region | SAC        |      |         | Gambian    |      |         |
|----------|---------|--------|------------|------|---------|------------|------|---------|
|          |         |        | SNP        | MAF  | P-value | SNP        | MAF  | P-value |
| Model 1  | NRG1    | 8p12   | rs16879814 | 0.22 | 0.8200  | rs16879814 | 0.23 | 0.3952  |
|          | NRG3    | 10q23  | rs11191757 | 0.33 | 0.1287  | rs2224109  | 0.13 | 0.3365  |
| Model 2  | GRIK1   | 21q22  | rs465555   | 0.49 | 0.4642  | rs460583   | 0.42 | 0.1397  |
|          | GRIK3   | 1p34   | rs3738085  | 0.39 | 0.8017  | rs476894   | 0.40 | 0.4022  |
| Model 3  | SFTPD   | 10q22  | rs1923537  | 0.28 | 0.8429  |            |      |         |
|          | NOD2    | 16q12  | rs748855   | 0.18 | 0.4041  |            |      |         |
| Model 4  | IL23R   | 1p31   | rs10489628 | 0.49 | 0.7888  | rs10489628 | 0.12 | 0.1323  |
|          | ATG4C   | 1p31   | rs11208029 | 0.11 | 0.3534  | rs11208029 | 0.41 | 0.4644  |
| Model 5  | FUT8    | 14q23  | rs17102844 | 0.05 | 0.3336  | rs9323464  | 0.47 | 0.0140  |
|          | B4GALT1 | 9p13   | rs12342831 | 0.25 | 0.8881  | rs10758189 | 0.18 | 0.0358  |
| Model 6  | EXT1    | 8q24   | rs6469713  | 0.02 | 0.8728  |            |      |         |
|          | EXT2    | 11p11  | rs903509   | 0.10 | 0.6867  |            |      |         |
| Model 7  | ISG15   | 1p36   | rs15842    | 0.14 | 0.0149  |            |      |         |
|          | TLR8    | Xp22   | rs3761624  | 0.38 | 0.5738  |            |      |         |
| Model 8  | NCAM2   | 21q21  | rs8134735  | 0.04 | 0.7718  | rs8132838  | 0.23 | 0.2967  |
|          | IRF8    | 16q24  | rs8054065  | 0.47 | 0.1589  | rs147968   | 0.18 | 0.1974  |
| Model 9  | ANK1    | 8p11   | rs2102360  | 0.13 | 0.2941  |            |      |         |
|          | ANK3    | 10q21  | rs2393618  | 0.16 | 0.3319  |            |      |         |
| Model 10 | NELL1   | 11p15  | rs1377741  | 0.35 | 0.0798  | rs1377741  | 0.39 | 0.1964  |
|          | NOS2    | 17q11  | rs2297516  | 0.50 | 0.2571  | rs2314809  | 0.46 | 0.3252  |
| Model 11 | CADM3   | 1q21   | rs16841729 | 0.10 | 0.0562  |            |      |         |
|          | SLC22A4 | 5q31   | rs13179900 | 0.06 | 0.7064  |            |      |         |
| Model 12 | ANK2    | 4q25   | rs1354679  | 0.39 | 0.3830  | rs1354679  | 0.31 | 0.7538  |
|          | ANK3    | 10q21  | rs10821731 | 0.45 | 0.1023  | rs10761481 | 0.43 | 0.8734  |
| Model 13 | NELL1   | 11p15  | rs4614448  | 0.40 | 0.7614  | rs4614448  | 0.43 | 0.0022  |
|          | CADM2   | 3p12   | rs17024414 | 0.19 | 0.4179  | rs17024876 | 0.46 | 0.2754  |
| Model 14 | NLRC5   | 16q13  | rs289726   | 0.48 | 0.3474  |            |      |         |
|          | IL12RB1 | 19p13  | rs393548   | 0.19 | 0.4955  |            |      |         |
| Model 15 | PLCB1   | 20p12  | rs708914   | 0.42 | 0.7643  | rs1703634  | 0.45 | 0.4542  |
|          | PLCE1   | 10q23  | rs4918082  | 0.44 | 0.8491  | rs4918082  | 0.48 | 0.7421  |
| Model 16 | C1QA    | 1p36   | rs12033074 | 0.42 | 0.7034  |            |      |         |
|          | TMEFF2  | 2q32   | rs4077949  | 0.50 | 0.9403  |            |      |         |
| Model 17 | NELL1   | 11p15  | rs11025887 | 0.39 | 0.9114  | rs12577018 | 0.47 | 0.2634  |
|          | CADM3   | 1q21   | rs862991   | 0.45 | 0.6270  | rs862991   | 0.31 | 0.6527  |
| Model 18 | PDE2A   | 11q13  | rs171021   | 0.23 | 0.5357  | rs3781931  | 0.16 | 0.9916  |
|          | PDE4B   | 1p31   | rs536025   | 0.14 | 0.2809  | rs17423910 | 0.05 | 0.4467  |
| Model 19 | CHST11  | 12q23  | rs17036205 | 0.04 | 0.9026  | rs17036205 | 0.22 | 0.2632  |
|          | CHSY3   | 5q23   | rs32225    | 0.41 | 0.8596  | rs244745   | 0.03 | 0.9337  |
| Model 20 | SLC22A4 | 5q31   | rs2306772  | 0.07 | 0.6799  | rs3792880  | 0.13 | 0.2623  |
|          | ALOX5   | 10q11  | rs3740107  | 0.25 | 0.0164  | rs3780909  | 0.49 | 0.3145  |
